# Supplementary material for: Populus euphratica Apyrases Increase Drought Tolerance by Modulating Stomatal Aperture in Arabidopsis
Source: MDPI journal article supplement (doi:10.3390/ijms22189892), 2021-09-13
Supplement: s1 [file s1]

**Table S1.** Accession numbers of apyrase orthologs used in multiple sequence alignment and phylogenetic analysis.

| Sequence name | Accession number | Sequence name | Accession number |
|---------------|------------------|---------------|------------------|
| AtAPY1        | NP_187058.1      | AtAPY2        | NP_197329.5      |
| NtAPY1        | XP_016476679.1   | NtAPY2        | XP_016463837.1   |
| OsAPY1        | XP_015632681.1   | OsAPY2        | XP_015647007.1   |
| PeAPY1        | XM_011001170.1   | PeAPY2        | XM_011036124.1   |
| PtAPY1        | XP_002325398.1   | PtAPY2        | XP_002319138.3   |
| StAPY1        | XP_006364259.1   | StAPY2        | XP_006342448.1   |
