# Supplementary material for: Populus euphratica Apyrases Increase Drought Tolerance by Modulating Stomatal Aperture in Arabidopsis
Source: MDPI journal article supplement (doi:10.3390/ijms22189892), 2021-09-13
Supplement: s1 [file s1]

**Table S2.** Primers used for quantitative real-time PCR

| Gene            | Forward primer (5'-3')  | Reverse primer (5'-3')  |
|-----------------|-------------------------|-------------------------|
| <i>RBOHF</i>    | CCAATGTCCTGCGGTTTC      | TTGTTGTTTCGTCGGCTC      |
| <i>RBOHD</i>    | GATGGGAGACAGCAGGAT      | TTTCGACAAACAGGCAAC      |
| <i>AtACTIN2</i> | GGTAACATTGTGCTCAGTGGTGG | AACGACCTTAATCTTCATGCTGC |
