# Supplementary material for: Populus euphratica Apyrases Increase Drought Tolerance by Modulating Stomatal Aperture in Arabidopsis
Source: Int J Mol Sci. 2021 Sep 13;22(18):9892. doi: 10.3390/ijms22189892 (PMC8468604; doi:10.3390/ijms22189892)
Supplement: Supplementary file 1 [file ijms-22-09892-s001.zip]

Archive with 7 entries (7 files):
- Figure S1_corrected.pdf
- Figure S2_corrected.pdf
- Figure S3_corrected.pdf
- Figure S4_corrected.pdf
- Figure S5_corrected.pdf
- Table S1_corrected.pdf
- Table S2_corrected.pdf
